# Supplementary material for: Histone Deacetylase Inhibitors Enhance CD4 T Cell Susceptibility to NK Cell Killing but Reduce NK Cell Function
Source: PubMed Central journal article supplement (PMC4986965; doi:10.1371/journal.ppat.1005782), 2016-08-16
Supplement: ppat.1005782.s012.pdf [file ppat.1005782.s012.pdf]

| ID     | Ethnic    | Gender | CD4 Count | VL  | ART Regimen                                    | Time on ART (months) |
|--------|-----------|--------|-----------|-----|------------------------------------------------|----------------------|
| ST-015 | Caucasian | Male   | 659       | <20 | emtricitabine, tenofovir, darunavir, ritonavir | 24                   |
| ST-033 | Caucasian | Male   | 791       | <20 | abacavir, dolutegravir, lamivudine             | 5                    |
| SM-47  | Caucasian | Male   | 750       | <20 | efavirenz, emtricitabine, tenofovir            | 32                   |
| SM-49  | Caucasian | Male   | 1160      | 30  | efavirenz, emtricitabine, tenofovir            | 37                   |
| SM-73  | Asian     | Male   | 1039      | <40 | abacavir, lamivudine, darunavir, ritonavir,    | 15                   |
| SM-130 | Caucasian | Male   | 550       | <20 | efavirenz, emtricitabine, tenofovir            | 6                    |
| SM-138 | Greek     | Male   | 475       | 53  | emtricitabine, tenofovir, raltegravir          | 1                    |
| SM-140 | Caucasian | Male   | 393       | <40 | emtricitabine, tenofovir, darunavir, ritonavir | 5                    |
